# Supplementary material for: Proceedings of the First Curing Coma Campaign NIH Symposium: Challenging the Future of Research for Coma and Disorders of Consciousness
Source: Neurocrit Care. 2021 Jul 8;35(Suppl 1):4–23. doi: 10.1007/s12028-021-01260-x (PMC8264966; doi:10.1007/s12028-021-01260-x)
Supplement: Supplementary file 2 — Supplementary file2 (PDF 581 kb) [file 12028_2021_1260_MOESM2_ESM.pdf]

# Curing Coma: challenging the future of research for coma and disorders of consciousness

September 9-10, 2020

## Part I. NIH Virtual Meeting

### Purpose:

To bring together a diverse and multidisciplinary group of individuals (scientists, clinician-scientists, patient advocacy representatives, and industry partners) to optimize and accelerate the science of recovery of consciousness. Curing Coma is a challenge that is broadly defined by the goal to **promote recovery of consciousness through early intervention and long-term support**.

### Attendee Engagement:

Throughout these 2 days, attendees are asked to write down research priorities for each of six topics. These priorities will be collated and assigned to the working groups (WG) mentioned below. The WG will continue developing the assigned priorities within the context of what has already been accomplished, and present recommendations during the *in-person meeting (Part II) May 3, 2021 at the NIH Natcher Conference Center in Bethesda, MD, USA*. Virtual Meeting attendees will be encouraged to sign up for one of the six WGs.

1. Research priorities for Biology of Coma
  - i. facilitator: **J Javier Provencio**
2. Research priorities for Coma Database
  - i. Facilitator: **Paul Vespa**
3. Research priorities for Care of the Comatose patient
  - i. Facilitator: **Molly McNett**
4. Research priorities for Prognostication
  - i. Facilitator: **Jan Claassen**
5. Research priorities for Early Clinical Trials
  - i. Facilitator: **Lori Shutter**
6. Research priorities for long-term recovery
  - i. Facilitator: **Amy Wagner**

### Planning Committee

- NINDS: 3-4 + other NIH investigators
- NCS:
  - Melanie Boly, MD, PhD (University of Wisconsin)
  - J Claude Hemphill, MD (University of California, San Francisco)
  - Molly M McNett, RN, PhD (Ohio State University)
  - DaiWai M Olson, RN, PhD (UT Southwestern)
  - Jose Javier Provencio, MD (University of Virginia)
  - Lori Shutter, MD (University of Pittsburgh)
  - Jose I Suarez, MD (Johns Hopkins University)
  - Paul Vespa, MD (University of California, Los Angeles)

**Session format**

|        |                                      |
|--------|--------------------------------------|
| 5 min  | Why is this relevant to curing coma? |
| 20 min | Content / State of the science       |
| 5 min  | What is the Gap?                     |

**Panel discussion format**

|        |                                                                                                                                                                                     |
|--------|-------------------------------------------------------------------------------------------------------------------------------------------------------------------------------------|
| 25 min | Two facilitators will help moderate these open discussions, which will consist of questions from attendees for the panel of investigators that prepared the content of the lecture. |
|--------|-------------------------------------------------------------------------------------------------------------------------------------------------------------------------------------|

**Day 1. Wednesday. 9 Sept 2020.**

| <b>Time</b>   | <b>Item Speaker</b>                                                                                                                   | <b>Moderator</b>                                   |
|---------------|---------------------------------------------------------------------------------------------------------------------------------------|----------------------------------------------------|
| 10:00 – 10:30 | Opening – Meeting Objectives                                                                                                          | Jeremy Brown<br>Jose I Suarez<br>J Claude Hemphill |
| 10:45 – 11:15 | Session 1 Defining phenotypes<br>Robert Stevens *<br>Michael Diringer<br>Geert Meyfroidt<br>Eric Rosenthal                            | Co-Chairs:<br>Javier Provencio<br>Shraddha Mainali |
| 11:15 – 11:40 | Panel Discussion                                                                                                                      | Q&A Facilitators:<br>Lori Madden<br>Holly Hinson   |
| 11:40 – 11:45 | Summarize                                                                                                                             | Javier Provencio<br>Shraddha Mainali               |
| 11:45 – 12:00 | Break                                                                                                                                 |                                                    |
| 12:00 - 12:30 | Session 2: Biomarkers<br>Brian Edlow *<br>Simone Sarasso<br>Sherry Chou<br>Nicholas Schiff                                            | Co-Chairs:<br>Sheila Alexander<br>Melanie Boly     |
| 12:30 – 12:55 | Panel Discussion                                                                                                                      | Q&A Facilitator<br>Paul Nyquist<br>Karen Hirsch    |
| 12:55 - 1:00  | Summarize                                                                                                                             | Sheila Alexander<br>Melanie Boly                   |
| 1:00 – 1:15   | Break                                                                                                                                 |                                                    |
| 1:15 – 1:45   | Session 3: Proof-of-concept clinical trials<br>Lori Shutter *<br>Daniel Kondziella<br>Stephan Mayer<br>Dan Hanley<br>Olivia Gosseries | Co-Chairs:<br>Molly McNett<br>Yama Akbari          |
| 1:45 – 2:10   | Panel Discussion                                                                                                                      | Q&A Facilitators:<br>Wendy Ziai<br>Santosh Murthy  |
| 2:10 - 2:15   | Summarize                                                                                                                             | Molly McNett<br>Yama Akbari                        |
| 2:15 – 2:30   | Closing                                                                                                                               |                                                    |

\*Each session will brainstorm ahead of time and pick a speaker or two to present

**Day 2. Thursday. 10 Sept 2020.**

| Time          | Item                                                                                                                    | Speaker                                               |
|---------------|-------------------------------------------------------------------------------------------------------------------------|-------------------------------------------------------|
| 10:00 – 10:30 | Session 4. Neuroprognostication<br>Wendy Ziai *<br>Brandon Foreman<br>Tom Bleck<br>David Greer<br>Susanne Muehlschlegel | Co-Chairs: 2<br>Jed Hartings<br>Theresa Human         |
| 10:30 – 10:55 | Panel Discussion                                                                                                        | Q&A Facilitators:<br>Sarah Livesay<br>Elizabeth Zink  |
| 10:55 – 11:00 | Summarize                                                                                                               | Jed Hartings<br>Theresa Human                         |
| 11:00 – 11:15 | Break                                                                                                                   |                                                       |
| 11:15 – 11:45 | Session 5. Long-term Recovery<br>Kathleen Bell *<br>Theresa Green<br>John Whyte<br>Martin Monti                         | Co-Chairs<br>Joseph Giacino<br>Amy Wagner             |
| 11:45 - 12:10 | Panel Discussion                                                                                                        | Q&A Facilitators:<br>MaryKay Bader<br>Nerissa Ko      |
| 12:10 – 12:15 | Summarize                                                                                                               | Joseph Giacino<br>Amy Wagner                          |
| 12:15 – 12:30 | Break                                                                                                                   |                                                       |
| 12:30 – 1:00  | Session 6. Large Data Sets (Database)<br>Luke James *<br>Raimund Helbok<br>Tarek Sharshar<br>Jose Suarez                | Co-Chairs:<br>Paul Vespa<br>Victoria McCredie         |
| 1:00 – 1:25   | Panel Discussion                                                                                                        | Q&A Facilitators:<br>Walter Videtta<br>Gisele Sampaio |
| 1:25 – 1:30   | Summarize                                                                                                               | Paul Vespa<br>Victoria McCredie                       |
| 1:30 – 1:45   | CLOSING Remarks                                                                                                         | Jeremy Brown<br>Jose I Suarez<br>J Claude Hemphill    |

\*Each session will brainstorm ahead of time and pick a speaker or two to present
